# Supplementary material for: NLRP3 phosphorylation in its LRR domain critically regulates inflammasome assembly
Source: PubMed Central journal article supplement (PMC8494922; doi:10.1038/s41467-021-26142-w), 2021-10-06
Supplement: 41467_2021_26142_MOESM1_ESM.pdf [file 41467_2021_26142_MOESM1_ESM.pdf]

**NLRP3 phosphorylation in its LRR domain critically regulates inflammasome assembly.**

Tingting Niu<sup>1,2</sup>, Charlotte De Rosny<sup>1</sup>, Séverine Chautard<sup>1</sup>, Amaury Rey<sup>1</sup>, Danish Patoli<sup>1</sup>, Marine Gros Lambert<sup>1</sup>, Camille Cosson<sup>1</sup>, Brice Lagrange<sup>1</sup>, Zhirong Zhang<sup>3</sup>, Orane Visvikis<sup>4</sup>, Sabine Hacot<sup>5</sup>, Maggy Hologne<sup>6</sup>, Olivier Walker<sup>6</sup>, Jeimin Wong<sup>2</sup>, Ping Wang<sup>7</sup>, Roméo Ricci<sup>3</sup>, Thomas Henry<sup>1</sup>, Laurent Boyer<sup>4</sup>, Virginie Petrilli<sup>5</sup>, and Bénédicte F. Py<sup>1,\*</sup>

**Supplementary Information**

**Supplementary Figs. 1-10**

**Supplementary Tables 1-5**

# Supplementary Figure 1

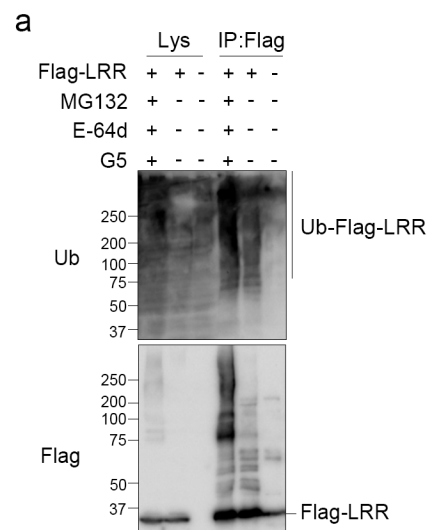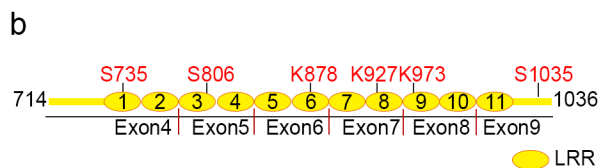

**c**

|        |     | K878 |         |                  |
|--------|-----|------|---------|------------------|
| Homo   | 868 | SGVA | ILCEKA  | KNPQC�NLQKLG 888 |
| Mus    | 865 | SGVQ | VLCEKMK | DPQC�NLQKLG 885  |
| Rattus | 865 | SGVQ | VLCEKMK | DPQC�NLQKLG 887  |
| Macaca | 867 | SGVA | ILCEKA  | KNPQC�NLQKLG 887 |

  

|        |     | K973  |       |                    |
|--------|-----|-------|-------|--------------------|
| Homo   | 963 | TLLT  | SSQS  | LRKLS LGNNDLGD 983 |
| Mus    | 960 | TILTH | NHSLR | KLNLGNNDLGD 980    |
| Rattus | 962 | TILTH | NQSLR | KLNLGNNDLGD 982    |
| Macaca | 962 | TLLT  | SSQS  | LRKLS LGNNDLGD 982 |

  

|        |     | K927 |       |                      |
|--------|-----|------|-------|----------------------|
| Homo   | 917 | LYLR | GNL   | LGDKG IKLLCEGLL 937  |
| Mus    | 914 | LYLR | SNALG | DGLRLLCEGLL 934      |
| Rattus | 916 | LYLR | SNALG | DGLKLLCEGLL 936      |
| Macaca | 916 | LYLR | GNL   | SLGDKG IKLLCEGLL 936 |

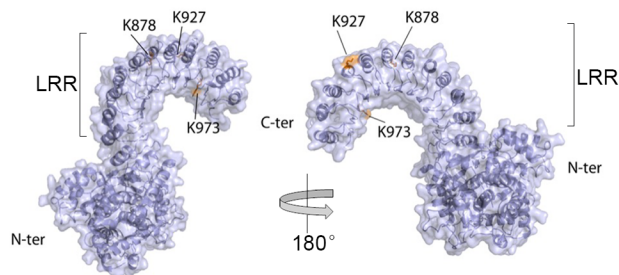

**d**

|        |     | S735 |        |                  |
|--------|-----|------|--------|------------------|
| Homo   | 725 | LTSS | FCRGLF | SVLSTQS LTE 745  |
| Mus    | 722 | LTSS | FCRGLF | SVLSTNR SLTE 742 |
| Rattus | 724 | LTSS | FCRGLF | SVLSTNQSLTE 744  |
| Macaca | 724 | LTSS | FCRGLF | SVLSTQS LTE 744  |

  

|        |     | S806 |         |                 |
|--------|-----|------|---------|-----------------|
| Homo   | 796 | SSNQ | LELDL   | SNALGDFGIRL 816 |
| Mus    | 793 | SSS  | QKLELDL | SNALGDFGIRL 813 |
| Rattus | 796 | SSS  | QKLELDL | SNALGDFGVRL 816 |
| Macaca | 796 | SSNQ | LELDL   | SNALGDFGIRL 816 |

  

|        |      | S1035 |       |     |
|--------|------|-------|-------|-----|
| Homo   | 1024 | KPELT | VVFEP | SW- |
| Mus    | 1021 | KPELT | IVFEI | SW- |
| Rattus | 1023 | KPELT | VVFEI | SW- |
| Macaca | 1023 | KPELT | IVFEP | SW- |

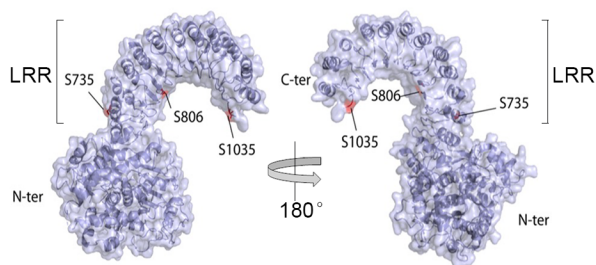

Supplementary Fig. 1. NLRP3 is ubiquitinated at K878, K927, K973, and phosphorylated at S735, S806, S1035. **a** 293T cells were transfected with plasmids coding for Flag-LRR. 1 day later, cells were treated with MG132 (10  $\mu$ M), E-64d (20  $\mu$ g/ml), and G5 (1  $\mu$ M) for 30 min. Flag-LRR was purified by anti-Flag immunoprecipitation and analyzed by SDS-PAGE followed by anti-Flag and anti-Ub WB. **b** Mapping of the identified modified residues in NLRP3 LRR domain structural and genomic sequences. Exons are numbered according to Exon1 encoding the ATG start codon. **c** K878 and K973 are conserved among species, but K927 is specific to human NLRP3. Alignments were performed using ClustalW2. Surface representation of the NACHT+LRR domains model of NLRP3 (6NPY.PDB) using PyMOL.<sup>16</sup> K878, K927, K973 (represented in orange) are all exposed at the surface of the NLRP3 LRR domain. **d** S735, S806 and S1035 are conserved among species and exposed at the surface of NLRP3 LRR domain. S735, S806 and S1035 are represented in red in the surface representation of the NACHT+LRR domains model of NLRP3 (6NPY.PDB) using PyMOL.<sup>16</sup> Data correspond to the one selected experiment used to perform the mass spectrometry analysis, out of 8 independent repeats. Molecular weights are indicated in kDa (a). Lys, lysates; IP: Flag, anti-Flag immunoprecipitates; Ub, ubiquitin.

Supplementary Figure 2

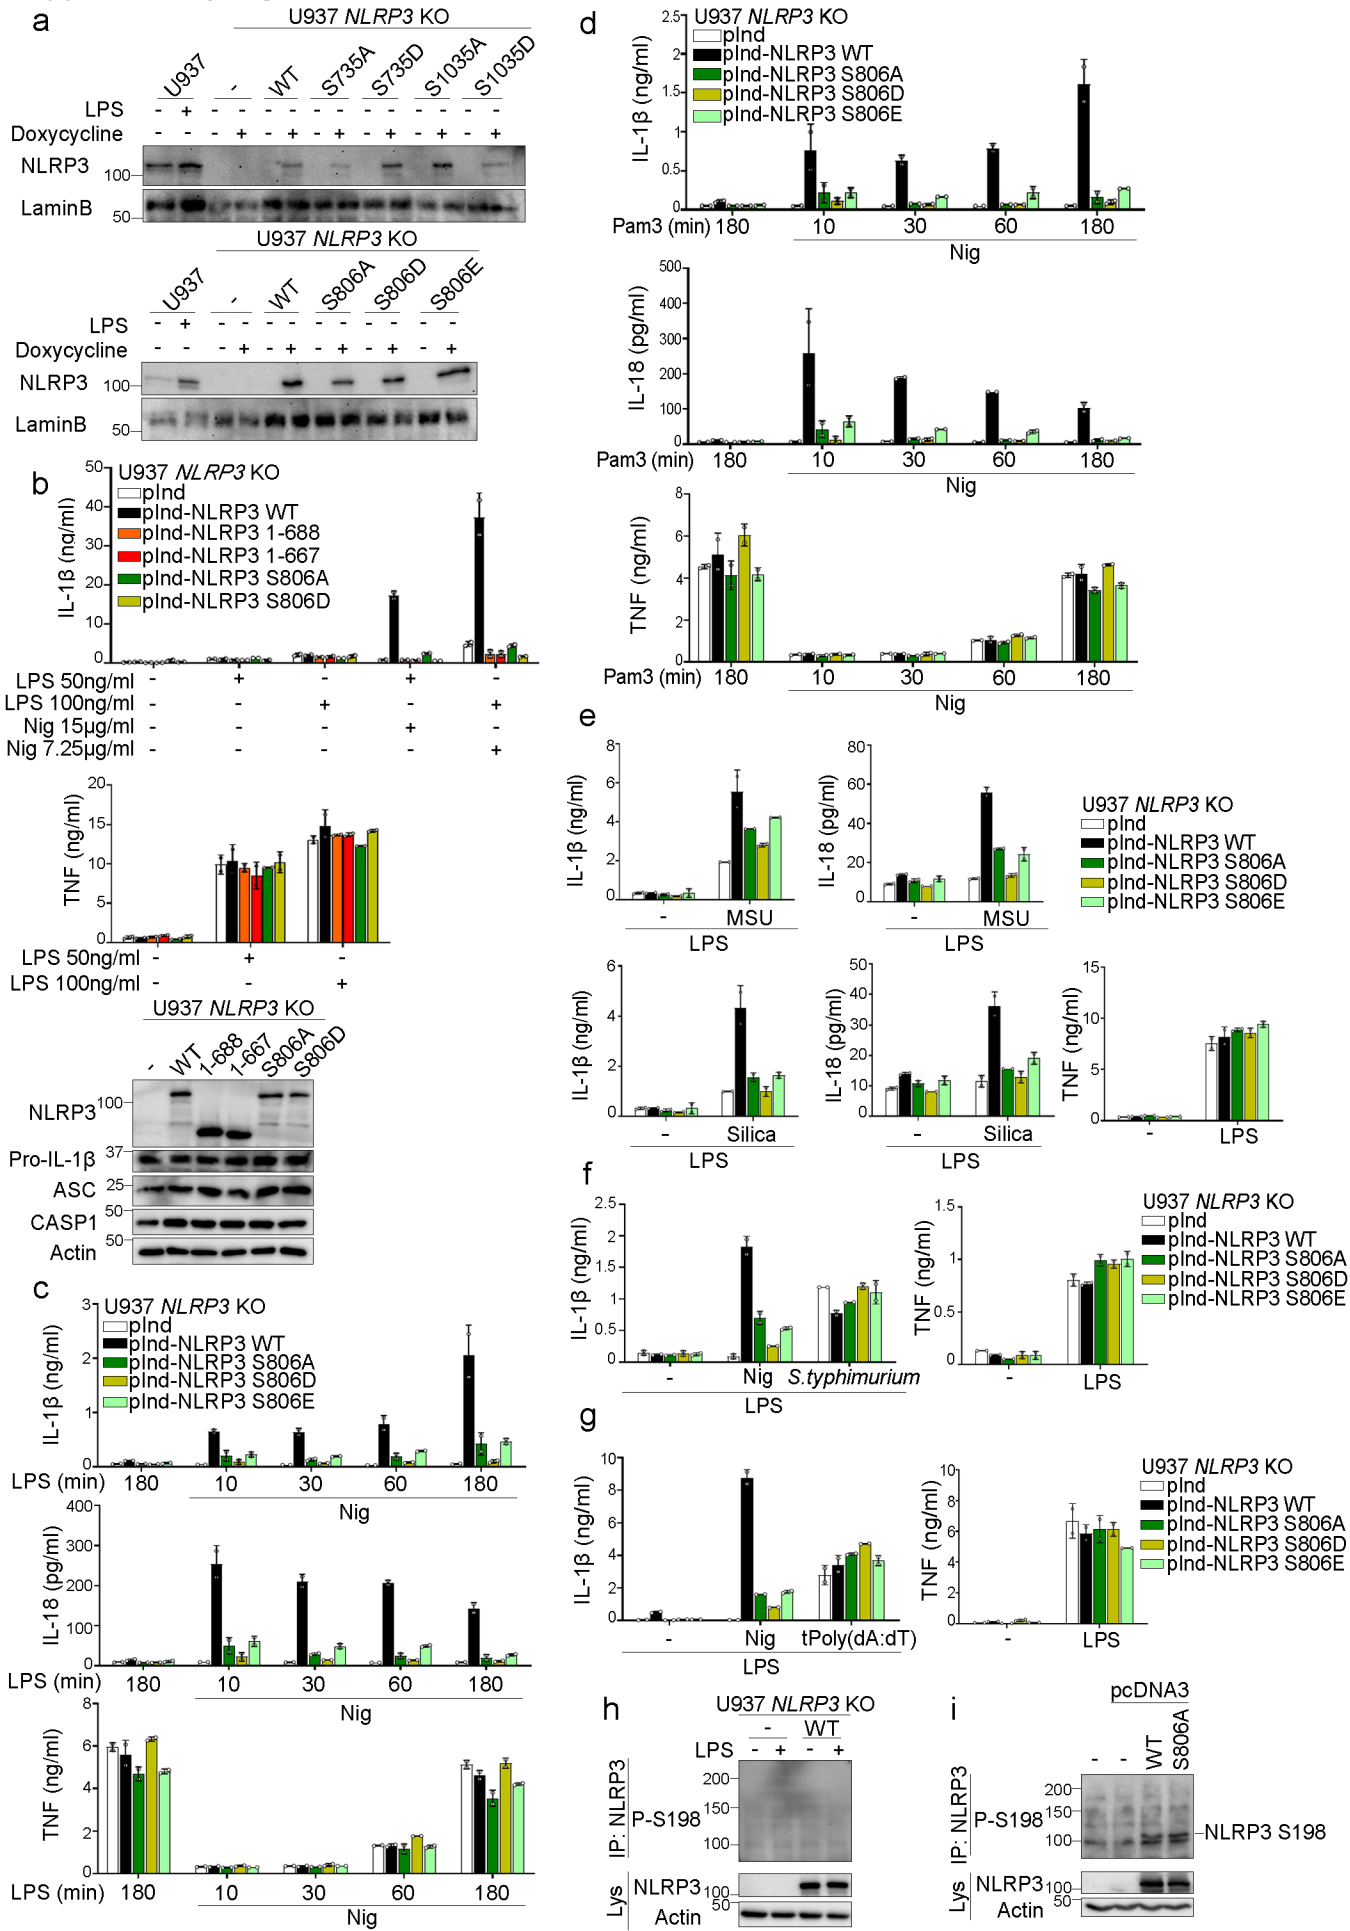

Supplementary Fig. 2. S806 is critical for NLRP3 inflammasome activity in human U937 monocytes. **a** U937 and NLRP3-deficient U937 cells reconstituted with NLRP3 mutants were differentiated with PMA and treated with doxycycline (2 µg/ml, 4h) or LPS (50 ng/ml, 4h) as indicated. NLRP3-deficient U937 cells reconstituted with empty lentivector were used as controls (-). NLRP3 expression was analyzed by WB. **b** NLRP3-deficient U937 cells reconstituted with NLRP3 mutants were differentiated with PMA and treated with doxycycline (2 µg/ml) and then with LPS (50 ng/ml, 4h) followed by nigericin (15 µg/ml, 1h), or PMA (50 ng/ml) for 16h, and then doxycycline (2 µg/ml) and LPS (100 ng/ml) for 11h, before media change and addition of nigericin (7.25 µg/ml, 1h). NLRP3-deficient U937 cells reconstituted with empty lentivector were used as controls (-). NLRP3 expression was analyzed by WB. **c** NLRP3-deficient U937 cells reconstituted with NLRP3 mutants were differentiated with PMA and treated with doxycycline (2 µg/ml, 4h) and LPS (50 ng/ml, time as indicated) followed by nigericin (15 µg/ml, 1h). IL-1β, IL-18 and TNF secretions were measured by ELISA. **d** NLRP3-deficient U937 cells reconstituted with doxycycline-inducible NLRP3 mutants were differentiated with PMA and treated with doxycycline (2 µg/ml, 4h) and Pam3CSK4 (1 µg/ml, time as indicated) followed by nigericin (15 µg/ml, 1h). IL-1β, IL-18 and TNF secretions were measured by ELISA. **e** NLRP3-deficient U937 cells reconstituted with NLRP3 mutants were sequentially treated with PMA, doxycycline (2 µg/ml, 4h), LPS (50 ng/ml, 4h) and MSU (250 µg/ml, 16h) or silica (25 µg/ml, 16h). IL-1β, IL-18 and TNF secretions were measured by ELISA. **f** NLRP3-deficient U937 cells reconstituted with NLRP3 mutants were sequentially treated with PMA, doxycycline (2 µg/ml, 4h), LPS (50

ng/ml, 3h) and infected with *S. Typhimurium* SL1344 (MOI 2.4, 2h). IL-1 $\beta$  and TNF secretions were measured by ELISA. **g** NLRP3-deficient U937 cells reconstituted with NLRP3 mutants were treated with PMA, doxycycline (2  $\mu$ g/ml, 4h), LPS (50 ng/ml, 3h) and transfected with poly(dA:dT) (1  $\mu$ g/ml, 6h). IL-1 $\beta$  and TNF secretions were measured by ELISA. **h** NLRP3-deficient U937 cells reconstituted with doxycycline-inducible NLRP3 were treated with PMA (50 ng/ml) and doxycycline (2  $\mu$ g/ml) for 16h, and then with LPS (50 ng/ml, 6h). Anti-NLRP3 immunoprecipitates were analyzed for pNLRP3<sub>S198</sub> using phospho-specific human pNLRP3<sub>S198</sub> antibodies by WB. **i** 293T cells ectopically expressing human NLRP3 WT or S806D mutant were analyzed by anti-NLRP3 immunoprecipitation followed by anti-pNLRP3<sub>S198</sub> WB. Means and 1 SD are shown. Data are representative of 2 independent experiments (a, b, h, i) and biological duplicates representative of 2 (f, g) and 3 (b, c, d, e) independent experiments. Molecular weights are indicated in kDa (a, b, h, i). pInd, pInducer21; Lys, lysates; IP: NLRP3, anti-NLRP3 immunoprecipitates.

# Supplementary Figure 3

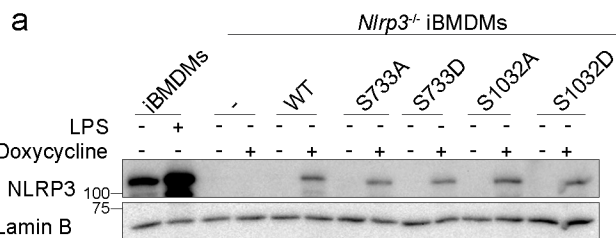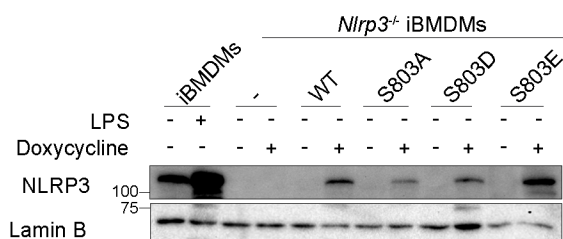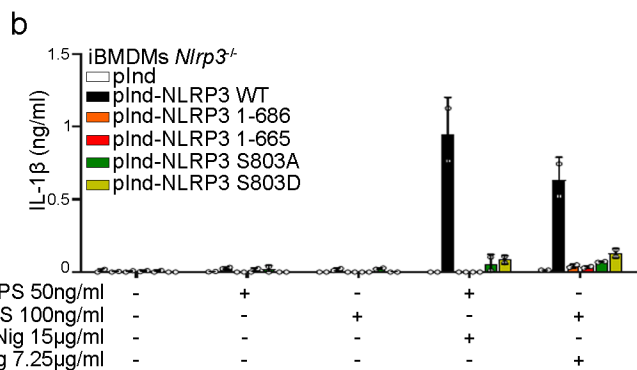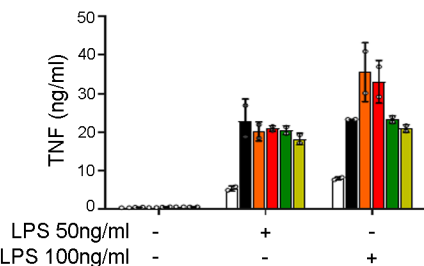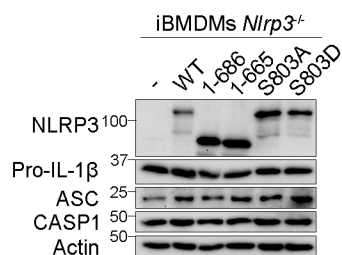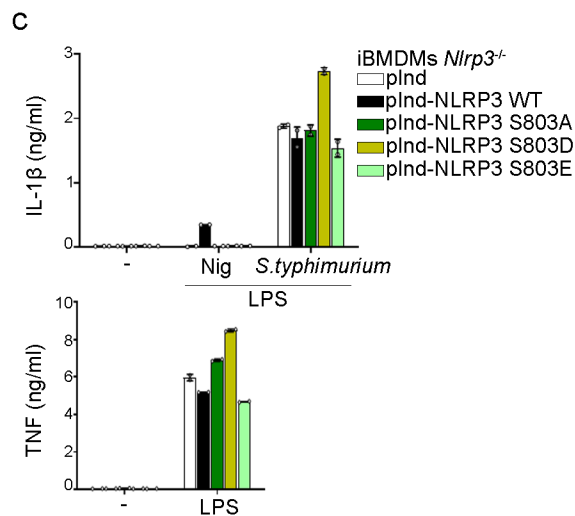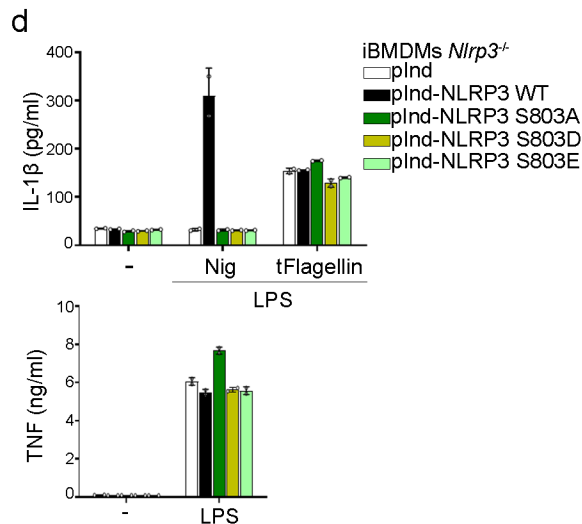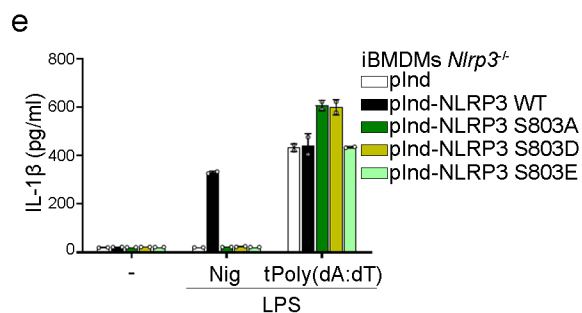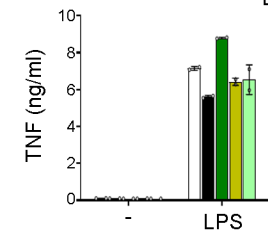

Supplementary Fig. 3. S803 is critical for NLRP3 inflammasome activity in immortalized BMDMs. **a** Immortalized WT and *Nlrp3*<sup>-/-</sup> BMDMs reconstituted with doxycycline-inducible NLRP3 mutants were treated with LPS (50 ng/ml, 4h) or doxycycline (2 µg/ml, 4h) as indicated. NLRP3 expression was analyzed by WB. **b** Immortalized *Nlrp3*<sup>-/-</sup> BMDMs reconstituted with doxycycline-inducible NLRP3 mutants were treated with either doxycycline (2 µg/ml, 16h) and then with LPS (50 ng/ml, 4h) followed by nigericin (15 µg/ml, 1h), or with doxycycline (2 µg/ml) and LPS (100 ng/ml) for 11h, before media change and addition of nigericin (7.25 µg/ml, 1h). IL-1β and TNF secretions were measured by ELISA. NLRP3 expression was analyzed by WB. **c** Immortalized *Nlrp3*<sup>-/-</sup> BMDMs reconstituted with doxycycline-inducible NLRP3 mutants were treated with doxycycline (2 µg/ml, 16h), LPS (50 ng/ml, 4h) and infected with *S. Typhimurium* (MOI 234, 2h). IL-1β and TNF secretions were measured by ELISA. **d** Immortalized *Nlrp3*<sup>-/-</sup> BMDMs reconstituted with doxycycline-inducible NLRP3 mutants were treated with doxycycline (2 µg/ml, 16h), LPS (50 ng/ml, 4h) and transfected with flagellin (10 µg/ml, 6h). IL-1β and TNF secretions were measured by ELISA. **e** Immortalized *Nlrp3*<sup>-/-</sup> BMDMs reconstituted with doxycycline-inducible NLRP3 mutants were treated with doxycycline (2 µg/ml, 16h), LPS (50 ng/ml, 4h) and transfected with poly(dA:dT) (1 µg/ml, 6h) as indicated. IL-1β and TNF secretions were measured by ELISA. Means and 1 SD are shown. Data are representative of 2 independent experiments (a, b) and biological duplicates representative of 2 (c, d, e) and 3 (b) independent experiments. Molecular weights are indicated in kDa (a, b). iBMDMs, immortalized BMDMs; pInd, pInducer21; tPoly(dA:dT), transfected poly(dA:dT).



# Supplementary Figure 4

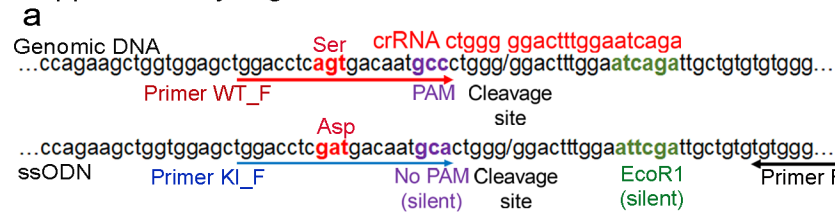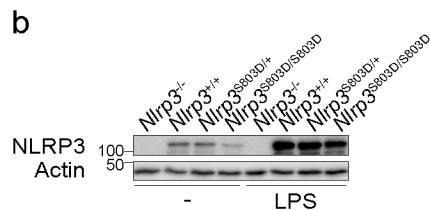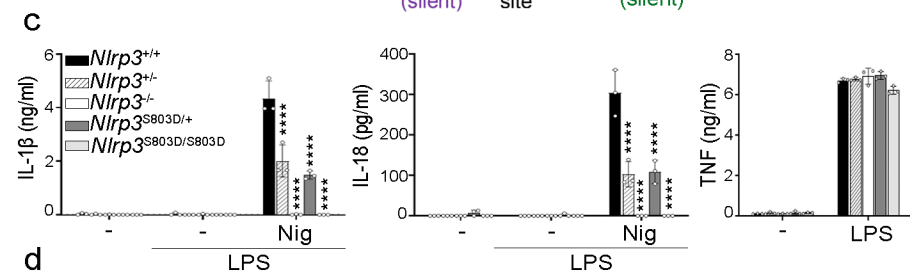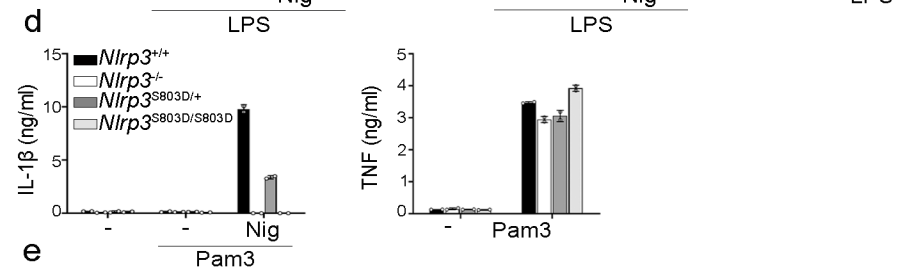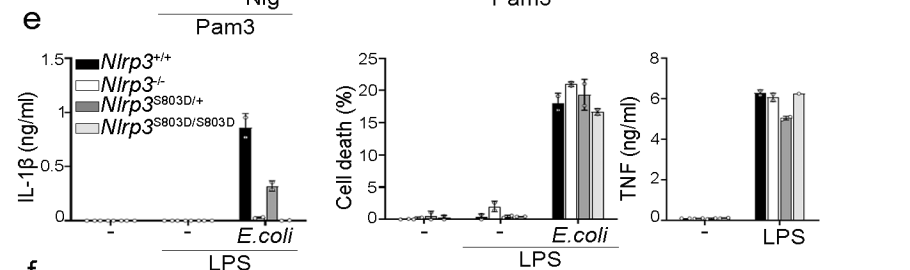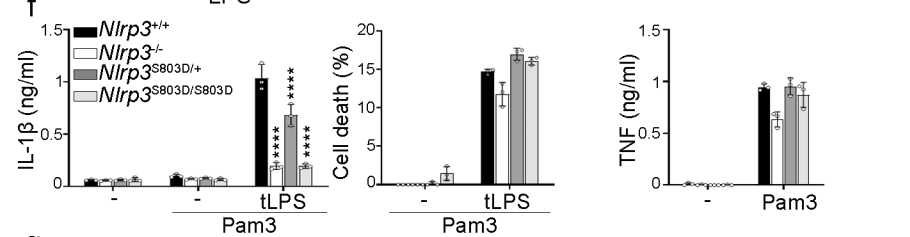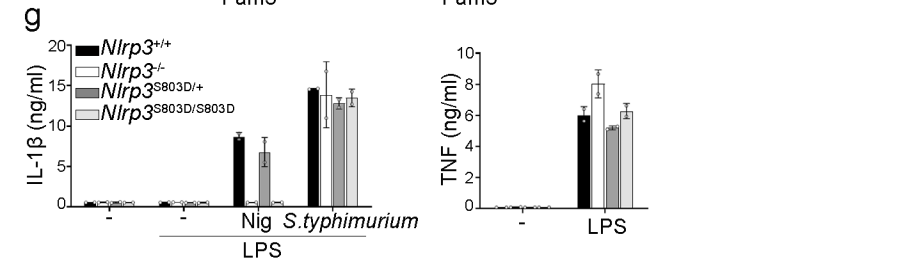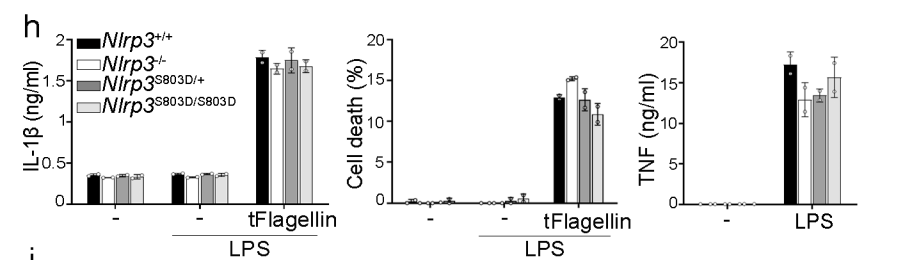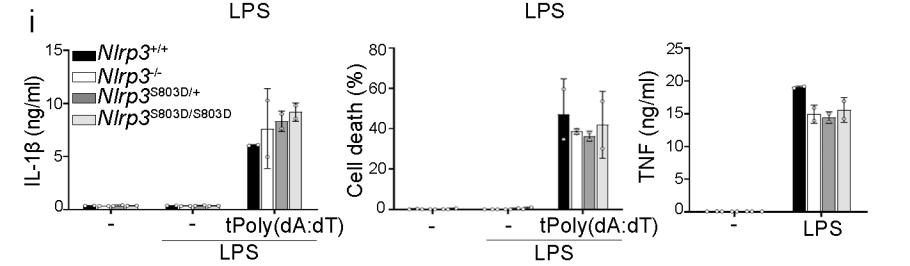

Supplementary Fig. 4. S803 is critical for NLRP3 inflammasome activity in primary BMDMs. **a** S803D mutagenesis strategy. CrRNA was designed to target Crispr/CAS9 cleavage in proximity to exon coding for S803. ssODN comprises 3 mutations: agT to gaT encoding the substitution of S803 to D (red), GCc to GCa silent mutation to remove the PAM sequence and prevent secondary cleavage (purple), ATcaGA to ATtcGA silent mutation to insert an EcoR1 site used for genotyping. Mice were genotyped by PCR using WT-F, KI-F specific primers with the R primer and confirmation by EcoR1 digestion pattern. **b** BMDMs from *Nlrp3*<sup>S803D/S803D</sup>, *Nlrp3*<sup>S803D/+</sup> and *Nlrp3*<sup>+/+</sup> littermate mice were treated with LPS (50 ng/ml, 4h) and NLRP3 expression in cell lysates was assessed by WB. **c** BMDMs from *Nlrp3*<sup>+/+</sup>, *Nlrp3*<sup>+/-</sup>, *Nlrp3*<sup>-/-</sup>, *Nlrp3*<sup>S803D/+</sup> and *Nlrp3*<sup>S803D/S803D</sup> mice were treated with LPS (50 ng/ml, 4h) followed by nigericin (15 µg/ml, 1h). **d** BMDMs from *Nlrp3*<sup>S803D/S803D</sup>, *Nlrp3*<sup>S803D/+</sup> and *Nlrp3*<sup>+/+</sup> littermates were primed with Pam3CSK4 (1 µg/ml, 1h) followed by nigericin (15 µg/ml, 1h) treatment as indicated. **e** BMDMs from *Nlrp3*<sup>S803D/S803D</sup>, *Nlrp3*<sup>S803D/+</sup> and *Nlrp3*<sup>+/+</sup> littermate mice were primed with LPS (50 ng/ml, 4h) followed by infection with *E. coli* (MOI 100, 16h). **f** BMDMs were primed with Pam3CSK4 (1 µg/ml, 4h) and then transfected with LPS (500 ng/ml, 20h). **g** BMDMs from *Nlrp3*<sup>S803D/S803D</sup>, *Nlrp3*<sup>S803D/+</sup> and *Nlrp3*<sup>+/+</sup> littermate mice were primed with LPS (50 ng/ml, 4h) followed by infection with *S. Typhimurium* (MOI 234, 2h) or treatment with nigericin (15 µg/ml, 1h) as a control. **h** BMDMs from *Nlrp3*<sup>S803D/S803D</sup>, *Nlrp3*<sup>S803D/+</sup> and *Nlrp3*<sup>+/+</sup> littermate mice were primed with LPS (50 ng/ml, 4h) followed by transfection with flagellin (10 µg/ml, 6h). **i** BMDMs from *Nlrp3*<sup>S803D/S803D</sup>, *Nlrp3*<sup>S803D/+</sup> and *Nlrp3*<sup>+/+</sup> littermate mice were primed with LPS (50 ng/ml, 4h) followed by transfection with poly(dA:dT) (1 µg/ml, 6h). IL-1β and TNF

secretions in the supernatant were measured by ELISA. Cell death was monitored by LDH release. BMDMs from *Nlrp3*<sup>-/-</sup> mice were used as controls. Means and 1 SD are represented. Data are representative of 2 independent experiments (b) and biological duplicates representative of 2 (c-i) independent experiments. Molecular weights are indicated in kDa b). tLPS, transfected LPS; tFlagellin, transfected flagellin; tPoly(dA:dT), transfected poly(dA:dT).

Supplementary Figure 5

a

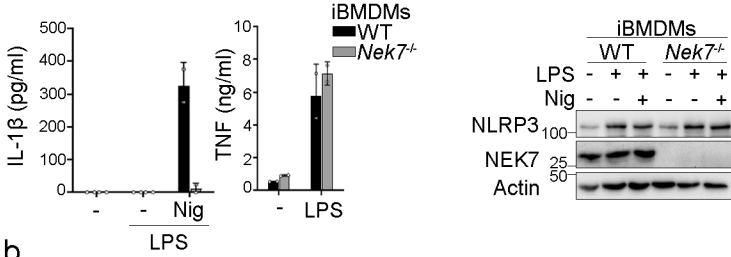

b

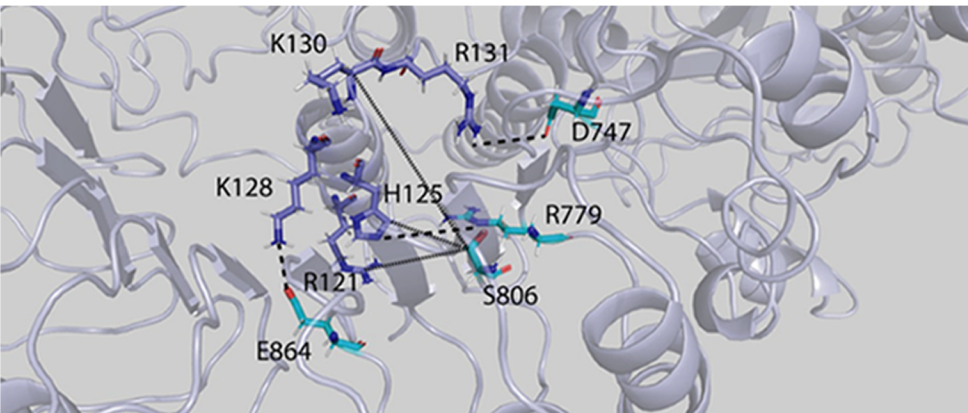

c

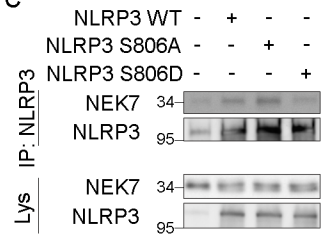

d

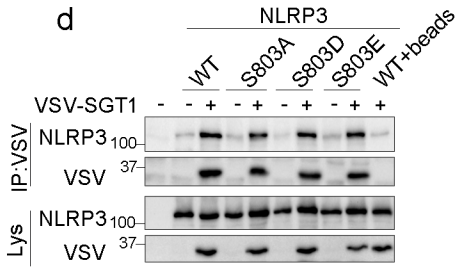

Supplementary Fig. 5. S803D substitution impairs NEK7 recruitment. **a** Immortalized WT and *Nek7*<sup>-/-</sup> BMDMs were treated with LPS (50 ng/ml, 4h) followed by nigericin (15 µg/ml, 1h). IL-1β and TNF secretions in the supernatant were measured by ELISA. NLRP3 and NEK7 protein level was analyzed by WB. Data are means and 1 SD of biological duplicates representative of 3 independent experiments. **b** Cartoon representation of the NLRP3/NEK7 complex around S806 using PyMOL software. Residues R121, H125, K128, K130 and R131 of NEK7 as well as D747, R779, S806 and E864 of NLRP3 are depicted in sticks. Distances between S806 and R131, H125 or K130 are depicted with short dotted lines and hydrogen bonds between D747-R131, R777-H125, E864-K128 are depicted with large dotted lines. **c** NLRP3 immunoprecipitates from lysates of HeLa cells expressing NLRP3 WT, S806D or S806A were analyzed for NEK7 by WB. **d** VSV-SGT1 immunoprecipitates from lysates of 293T cells expressing VSV-SGT1 and NLRP3 WT, S803A, S803D or S803E mutants were analyzed for NLRP3 by WB. Lysate of 293T expressing VSV-SGT1 and NLRP3 WT incubated with A/G-beads (WT+beads) was used as a negative control. Data are representative of 2 (d) and 3 (a, c) independent experiments. Molecular weights are indicated in kDa (a, c, d). iBMDMs, immortalized BMDMs; Lys, lysates; IP, immunoprecipitates.

Supplementary Figure 6

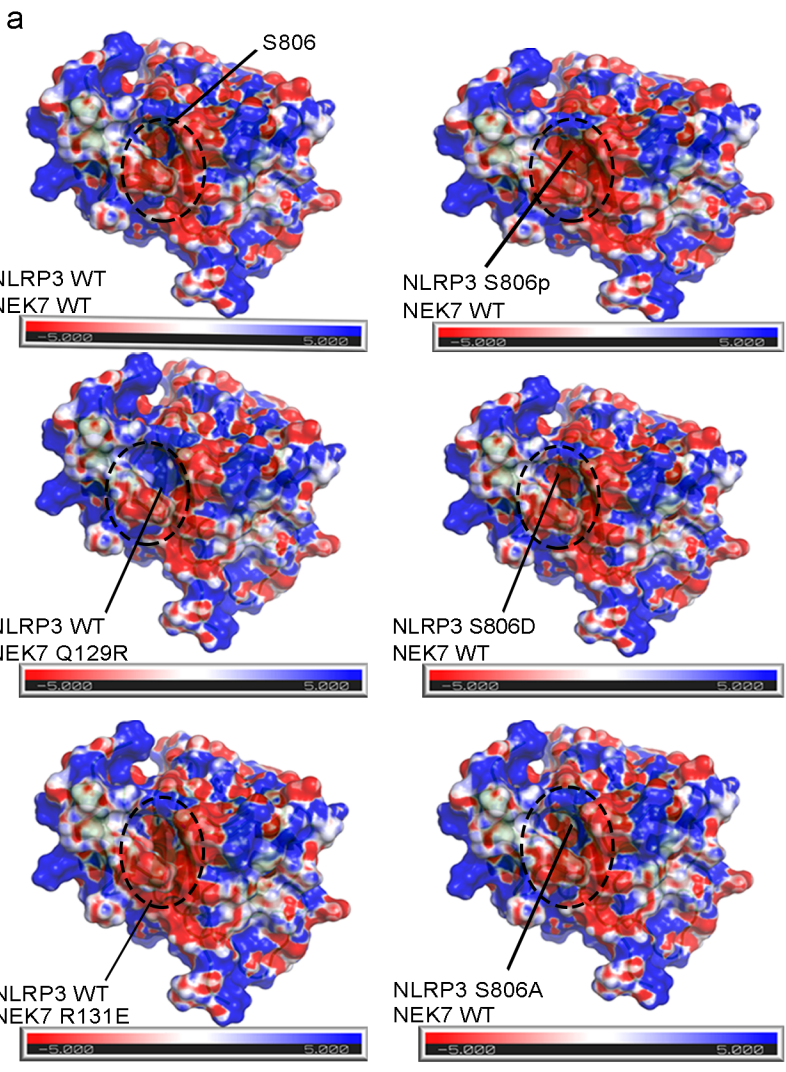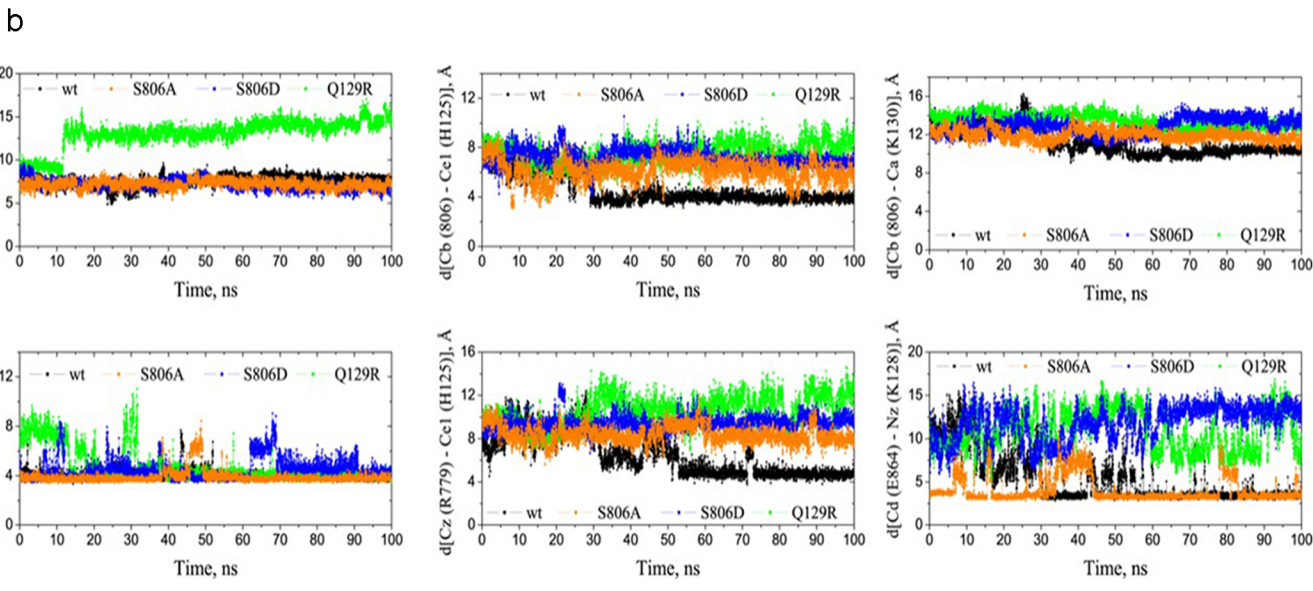

Supplementary Fig. 6. S803D substitution modifies NLRP3 interaction surface with NEK7. **a** Electrostatic potential surfaces of the NLRP3/NEK7 complexes with phosphorylated S806 (S806p), NLRP3 S806D, S806A and NEK7 Q129R, R131E. An ellipse is focused on the vicinity of the S806 of NLRP3. The position of each mutated residue is pointed on each structure. **b** Distances measurement ( $C_b$  (806)/ $C_z$  (R121),  $C_b$  (806)/ $C_{e1}$  (H125),  $C_b$  (806)/ $C_a$  (K130),  $C_g$  (D747)/ $C_z$  (R131),  $C_z$  (R779)/ $C_{e1}$  (H125) and  $C_d$  (E864)/ $N_z$  (K128)) along the 100 ns molecular dynamic trajectory for NLRP3/NEK7 complexes, and complexes with NLRP3 S806A, NLRP3 S806D and NEK7 Q129R.

Supplementary Figure 7

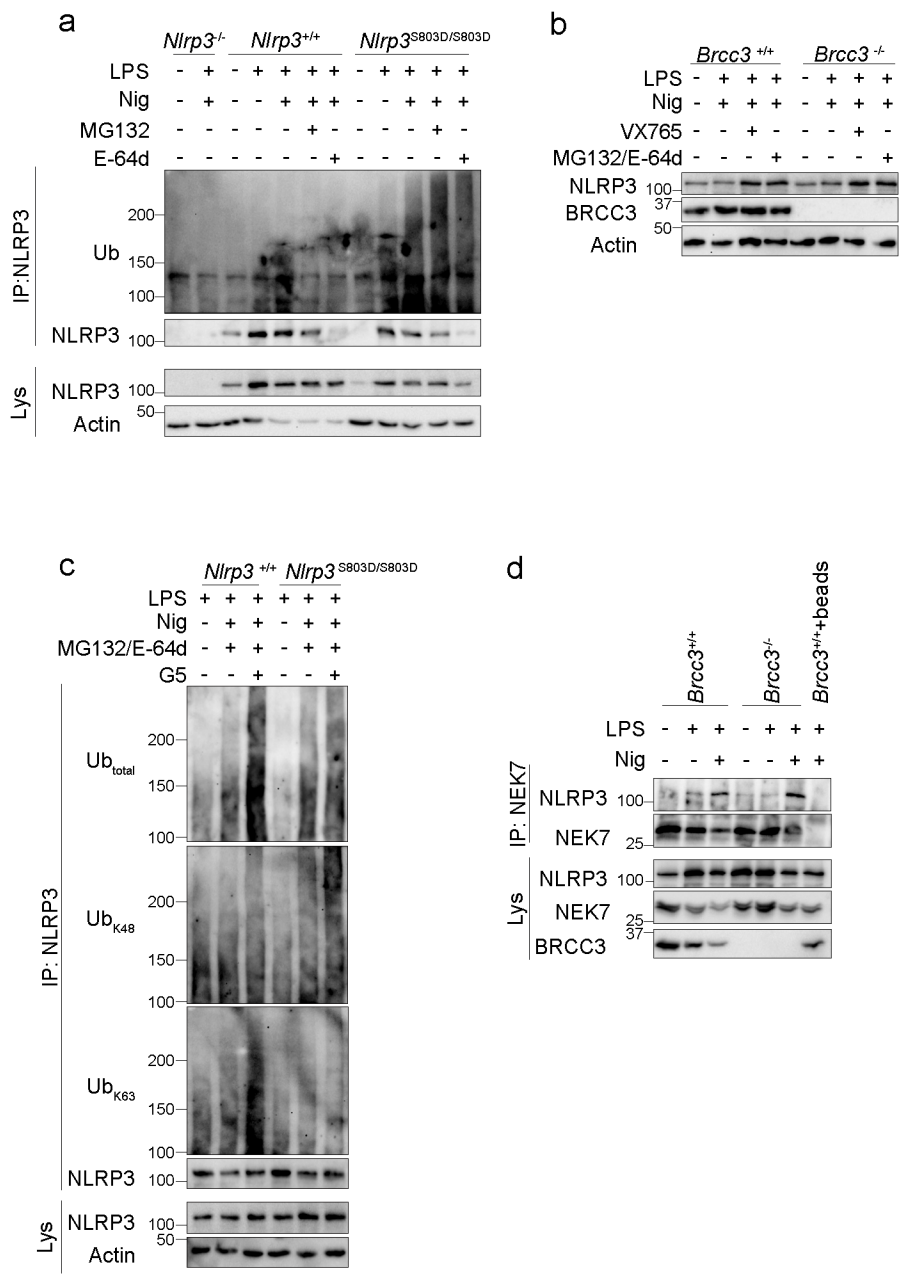



Supplementary Fig. 7. S803D substitution leads to degradative K48 ubiquitination following activation signal. **a** BMDMs from *Nlrp3*<sup>S803D/S803D</sup>, *Nlrp3*<sup>+/+</sup> and *Nlrp3*<sup>-/-</sup> mice were primed with LPS (50 ng/ml, 6h) and then treated with nigericin (15 µg/ml, 45 min) 15 min before the addition of MG132 (10 µM, 30 min) and E-64d (20 µg/ml, 30 min). NLRP3 ubiquitination was assessed by NLRP3 immunoprecipitation followed by anti-Ub WB. **b** BMDMs from *Brcc3*<sup>-/-</sup> and *Brcc3*<sup>+/+</sup> littermate mice were primed with LPS (50 ng/ml, 5h) followed by nigericin (15 µg/ml, 1h) treatment. Cells were treated with VX765 (2.5 µM), MG132 (10 µM) and/or E-64d (20 µg/ml) 15 min before nigericin. NLRP3 and BRCC3 protein levels were analyzed by WB. **c** BMDMs from WT and *Nlrp3*<sup>S803D/S803D</sup> mice were primed with LPS (50 ng/ml, 5h) followed by nigericin (15 µg/ml, 1h) treatment. Cells were treated with MG132 (10 µM), E-64d (20 µg/ml) or G5 (1 µM) 15 min before nigericin. NLRP3 immunoprecipitates were analyzed for K63 Ub, K48 Ub and total Ub by WB. **d** BMDMs from *Brcc3*<sup>-/-</sup>, and *Brcc3*<sup>+/+</sup> littermate mice were primed with LPS (50 ng/ml, 6h) followed by nigericin (15 µg/ml, 30 min) treatment. Endogenous NEK7 immunoprecipitates were analyzed for NLRP3 by WB. Lysate of *Brcc3*<sup>+/+</sup> BMDMs incubated with A/G-beads (*Brcc3*<sup>+/+</sup>+beads) was used as a negative control. Data are representative of 2 (a, b, d) and 3 (c) independent experiments. Molecular weights are indicated in kDa (a-d). Lys, lysates; IP, immunoprecipitates; Ub, ubiquitin.

Supplementary Figure 8

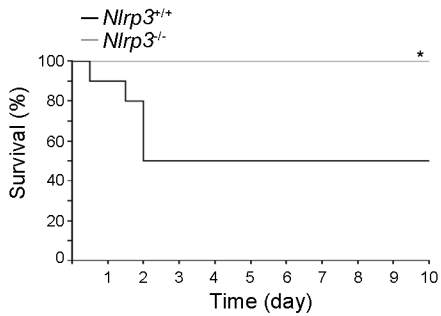

Supplementary Fig. 8. *Nlrp3*<sup>-/-</sup> mice show an impaired response to endotoxic shock in vivo. *Nlrp3*<sup>-/-</sup> (n=7) and *Nlrp3*<sup>+/+</sup> (n=10) littermates were injected intraperitoneally with LPS (10 mg/kg). Two-sided Mantel-Cox test, \*, p<0.05. Data are biological replicates of one experiment.

Supplementary Figure 9

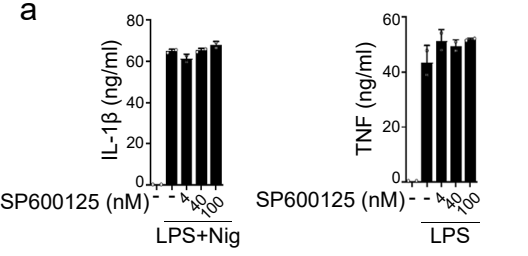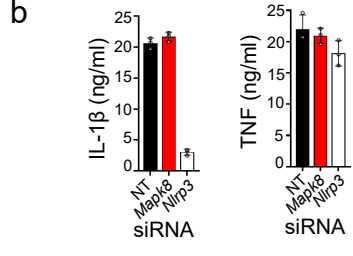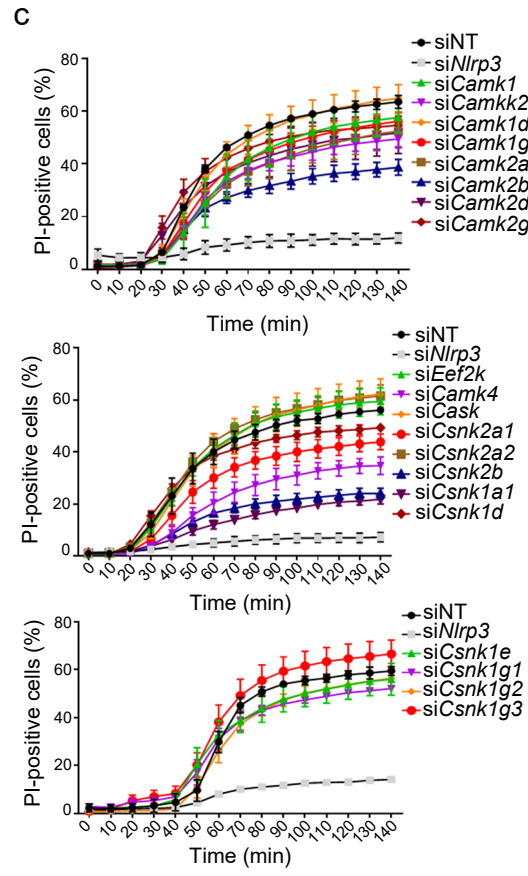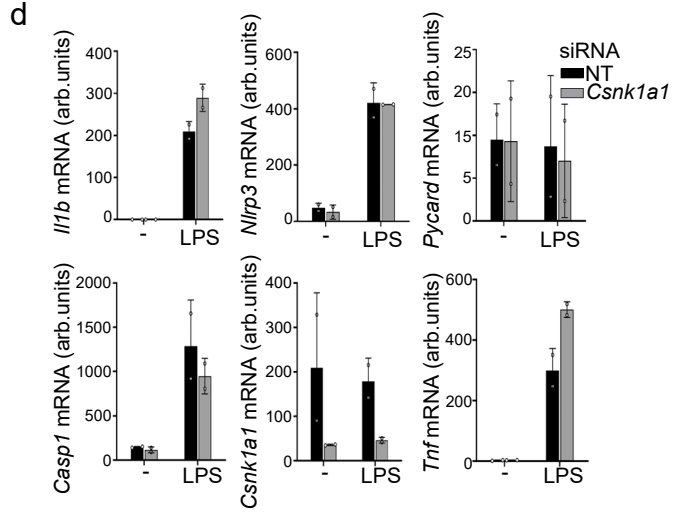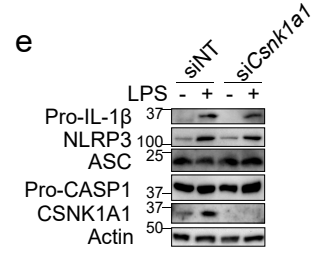

Supplementary Fig. 9. CSNK1A1 phosphorylates NLRP3 at S806. **a** BMDMs were treated with SP600125 15 min prior priming with LPS (50 ng/ml, 4h) followed by treatment with nigericin (15 mg/ml, 1h). IL-1 $\beta$  and TNF secretions were measured by ELISA. **b** BMDMs transfected with the indicated siRNAs were treated with LPS (50 ng/ml, 4h) followed by nigericin (15  $\mu$ g/ml, 1h). IL-1 $\beta$  and TNF secretions were measured by ELISA. **c** BMDMs were transfected with the indicated siRNAs and treated with LPS (50 ng/ml, 4h) followed by nigericin (15  $\mu$ g/ml). Cell death was monitored by PI incorporation over time quantified by high content microscopy. **d** BMDMs were transfected with siRNA targeting *Csnk1a1* and treated with LPS (50 ng/ml, 6h). Relative gene expressions of each indicated gene were analyzed by qPCR using *Gapdh* and *Hprt* as reference genes. Means and 1 SD of two independent experiments done in duplicate are represented. Non-targeting siRNAs were used as controls. **e** Pro-IL-1 $\beta$ , NLRP3, ASC, Caspase-1, CSNK1A1 and TNF protein levels in cell lysate were analyzed by WB. Means and 1 SD are represented. Data are biological duplicates representative of 2 independent experiments (a, b), biological quadruplicates representative of 3 independent experiments (c), means of 2 independent experiments (d) or representative of 2 independent experiments (e). Molecular weights are indicated in kDa (e). NT, non-targeting siRNA; arb.units, arbitrary unit.

# Supplementary Figure 10

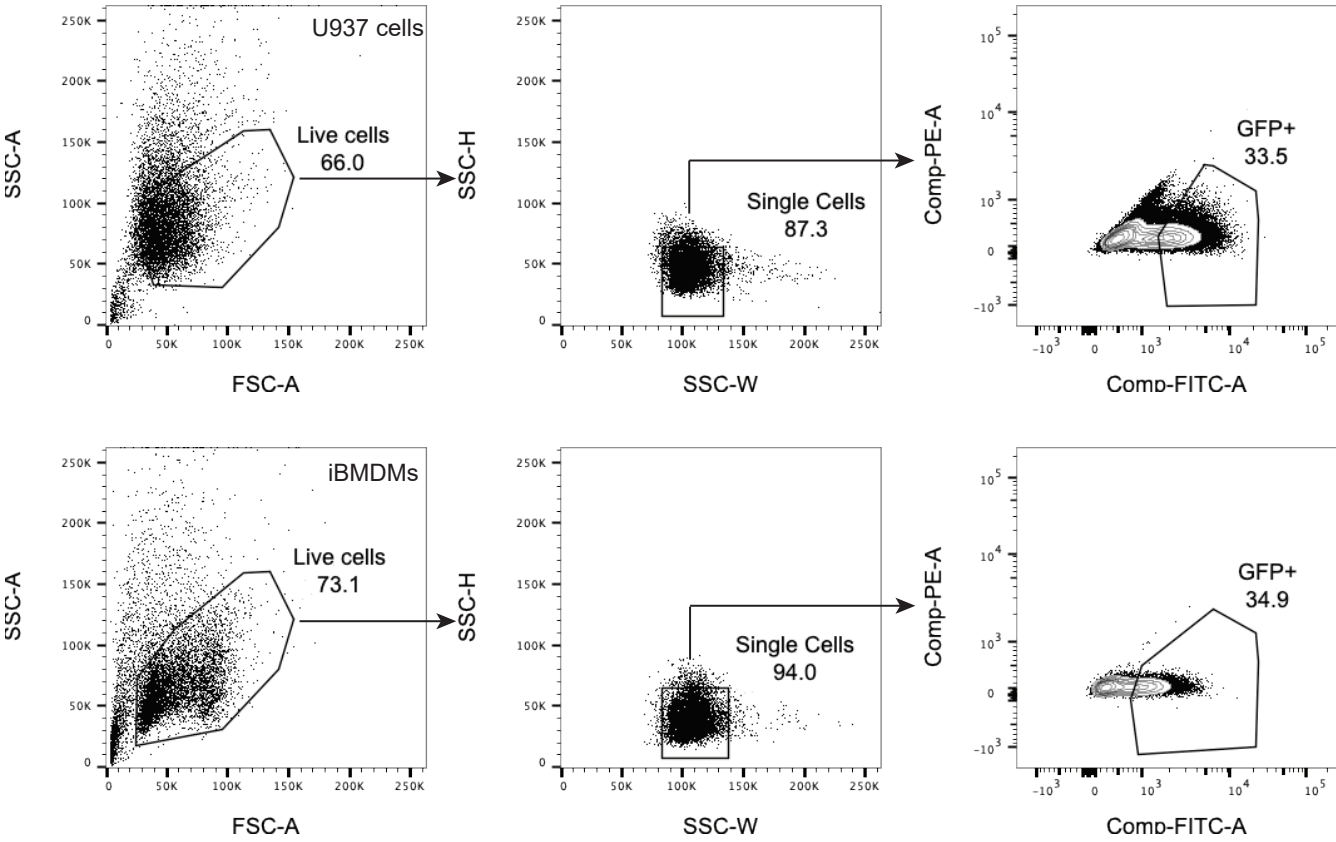

Supplementary Fig. 10. FACS sequential gating and GFP<sup>+</sup> cell sorting strategies to select NLRP3-deficient U937 cells (upper panel) and *Nlrp3*<sup>-/-</sup> immortalized BMDMs (lower panel) reconstituted with pInducer21-NLRP3 constructs. Percentages in the parent populations are indicated. iBMDMs, immortalized BMDMs.

|       | NLRP3/NEK7<br>15 H bounds                                                                                                                       | NLRP3 S806A/NEK7<br>20 H bounds                                                                                                                                                                     | NLRP3 S806D/NEK7<br>9 H bounds                                                            | NLRP3/NEK7 Q129R<br>9 H bounds                                              | NLRP3/NEK7 R131E<br>11 H bounds                                                                         |
|-------|-------------------------------------------------------------------------------------------------------------------------------------------------|-----------------------------------------------------------------------------------------------------------------------------------------------------------------------------------------------------|-------------------------------------------------------------------------------------------|-----------------------------------------------------------------------------|---------------------------------------------------------------------------------------------------------|
| LRR   | D747-R131<br>E864-K128<br>R779-H125<br>D807-R121<br>Y1009-A193<br>Y1009-H194<br>W833-Q129<br>E1007-R184<br>S1035-T199<br>Q638-E265<br>D641-R294 | D747-R131<br>E864-K128<br>R779-A116<br>R779-I169<br>D807-R121<br>K696-D261<br>E636-R268<br>Q638-E265<br>E640-E266<br>D641-C298<br>D641-R294<br>S1035-K127<br>K1015-M241<br>E1033-Y237<br>W1036-S234 | D747-R131<br>E864-R121<br>R779-T170<br>E1007-K127<br>Y1012-M241<br>R920-H125<br>D867-R121 | D747-R131<br>E864-R121<br>E1033-K240<br>D980-K189<br>D804-R129<br>D750-R136 | D747-R136<br>E864-R121<br>D807-R121<br>R920-H125<br>E640-E265<br>V1030-Y237<br>E1033-M241<br>S1035-L243 |
| NACHT | Q181-K140<br>Q181-T172<br>R183-A171<br>E356-R294                                                                                                | E214-H151<br>E214-R155<br>E217-R155<br>R178-A297<br>E176-K293                                                                                                                                       | E214-R155<br>E356-R294                                                                    | E356-R294<br>E182-T299<br>Q185-T299                                         | S216-E150<br>E217-R155<br>E176-R294                                                                     |

Supplementary Table 1. Molecular dynamics of NLRP3-NEK7 complex. List of the hydrogen bonds for each structure after 100 ns of molecular dynamic simulations



| Kinase family | Kinase subfamily | Official symbol |        | Gene ID |       |
|---------------|------------------|-----------------|--------|---------|-------|
|               |                  | Mouse           | Human  | Mouse   | Human |
| CAMK          | CAMK1            | Camk1           | CAMK1  | 52163   | 8536  |
|               |                  | Camkk2          | CAMKK2 | 207565  | 10645 |
|               |                  | Camk1d          | CAMK1D | 227541  | 57118 |
|               |                  | Camk1g          | CAMK1G | 215303  | 57172 |
|               | CAMK2            | Camk2a          | CAMK2A | 12322   | 815   |
|               |                  | Camk2b          | CAMK2B | 12323   | 816   |
|               |                  | Camk2d          | CAMK2D | 108058  | 817   |
|               |                  | Camk2g          | CAMK2G | 12325   | 818   |
|               | CAMKIII          | Eef2k           | EEF2K  | 13631   | 29904 |
|               | CAMKIV           | Camk4           | CAMK4  | 12326   | 814   |
|               | CASK             | Cask            | CASK   | 12361   | 8573  |
| CK2 (CSNK2)   | Csnk2a1          | CSNK2A1         | 12995  | 1457    |       |
|               | Csnk2a2          | CSNK2A2         | 13000  | 1459    |       |
|               | Csnk2b           | CSNK2B          | 13001  | 1460    |       |
| CK1 (CSNK1)   | Csnk1a1          | CSNK1A1         | 93687  | 1452    |       |
|               | Csnk1d           | CSNK1D          | 104318 | 1453    |       |
|               | Csnk1e           | CSNK1E          | 27373  | 1454    |       |
|               | Csnk1g1          | CSNK1G1         | 214897 | 53944   |       |
|               | Csnk1g2          | CSNK1G2         | 103236 | 1455    |       |
|               | Csnk1g3          | CSNK1G3         | 70425  | 1456    |       |

Supplementary Table 2. Identification of 20 kinase candidates with consensus targeting site matching NLRP3 S803. NLRP3 S806 phosphorylation site was analyzed by GPS 3.0 and NetPhos 2.0 softwares to identify putative kinases with compatible consensus targeting sites. Their indicated mouse orthologs were then screened using siRNA for their impact on NLRP3 activity.

| Name                         | Sequence                                         | Application |
|------------------------------|--------------------------------------------------|-------------|
| hNLRP3_S735A_F               | 5'-gccggggcctcttGcagttctgagcaccagcc-3'           | cloning     |
| hNLRP3_S735A_R               | 5'-ggctgggtgctcagaactGCaagaggccccggc-3'          | cloning     |
| hNLRP3_S735D_F               | 5'-gccggggcctcttGATgttctgagcaccagcc-3'           | cloning     |
| hNLRP3_S735D_R               | 5'-ggctgggtgctcagaacATCaaagaggccccggc-3'         | cloning     |
| mNLRP3_S733A_F               | 5'-gccgtgtctctcGcaagttaagcacaacc-3'              | cloning     |
| mNLRP3_S733A_R               | 5'-ggttgggtcttagactgCgaagagaccacggc-3'           | cloning     |
| mNLRP3_S733D_F               | 5'-ctgccgtgtctctcGATagttaagcacaaccgg-3'          | cloning     |
| mNLRP3_S733D_R               | 5'-ccggttgggtcttagactATCgaagagaccacggcag-3'      | cloning     |
| hNLRP3_S806A_F               | 5'-gctggtggagctggacctgGCTgacaacgccctcg-3'        | cloning     |
| hNLRP3_S806A_R               | 5'-ccgagggcggtgtcaGCcaggtccagctccaccagc-3'       | cloning     |
| hNLRP3_S806D_F               | 5'-gctggtggagctggacctgATgacaacgccctcg-3'         | cloning     |
| hNLRP3_S806D_R               | 5'-ccgagggcggtgtcaTCcaggtccagctccaccagc-3'       | cloning     |
| mNLRP3_S803A_F               | 5'-ggtggagctggacctcGCTgacaatgccctgg-3'           | cloning     |
| mNLRP3_S803A_R               | 5'-ccagggcattgtcaGCcaggtccagctccacc-3'           | cloning     |
| mNLRP3_S803D_F               | 5'-ggtggagctggacctcGATgacaatgccctgg-3'           | cloning     |
| mNLRP3_S803D_R               | 5'-ccagggcattgtcaTCcaggtccagctccacc-3'           | cloning     |
| hNLRP3_S806E_F               | 5'-gtggagctggacctgGAGgacaacgccctcg-3'            | cloning     |
| hNLRP3_S806E_R               | 5'-ccgagggcggtgtcCTCaggtccagctccac-3'            | cloning     |
| mNLRP3_S803E_F               | 5'-gtggagctggacctGAGgacaatgccctggg-3'            | cloning     |
| mNLRP3_S803E_R               | 5'-ccccagggcattgtcCTCaggtccagctccac-3'           | cloning     |
| mNLRP3_S1032A_F              | 5'-tatagtctcgagattGcctggtgagctcgagatc-3'         | cloning     |
| mNLRP3_S1032A_R              | 5'-gatatctcgagctaccaggCaatctcgaagactata-3'       | cloning     |
| mNLRP3_S1032D_F              | 5'-gactatagtctcgagattGActggtgagctcgagatctag-3'   | cloning     |
| mNLRP3_S1032D_R              | 5'-ctagatatctcgagctaccagTCaatctcgaagactatagtc-3' | cloning     |
| hNLRP3_1F_BamHI              | 5'-CGTCGTCGAGGATCCACCACCATGaagatggcaagcaccgc-3'  | cloning     |
| hNLRP3_1995StopR_Xho1(1-667) | 5'-TGCAAACGGctcgagctaGGAAGAAACCATGTGGTC-3'       | cloning     |
| hNLRP3_2058StopR_Xho1(1-688) | 5'-TGCAAACGGctcgagctaGGGCATGTTATGGAGAAA-3'       | cloning     |
| mNLRP3_1F_Kpn1               | 5'-CGTCGTCGGGTACCACCATGacgagtgctcgttgaag-3'      | cloning     |
| mNLRP3_1995StopR_Xho1(1-665) | 5'-TGCAAACGGctcgagctaGGAGGAAACCACGTGGTC-3'       | cloning     |
| mNLRP3_2058StopR_Xho1(1-686) | 5'-TGCAAACGGctcgagctaGGCGAGTTGTGAAAAA-3'         | cloning     |
| mHprt_F                      | 5'-GGGCTTACCTCACTGCTTTCC-3'                      | qPCR        |
| mHprt_R                      | 5'-TCATCGCTAATCACGACGCTG-3'                      | qPCR        |
| mGapdh_F                     | 5'-GGGTTCTATAAATACGGACTGC-3'                     | qPCR        |
| mGapdh_R                     | 5'-CTGGCACTGCACAAGAAGAT-3'                       | qPCR        |
| mIl-1 $\beta$ _F             | 5'-TAACCTGCTGGTGTGTGACG-3'                       | qPCR        |
| mIl-1 $\beta$ _R             | 5'-GCTTGTGCTCTGCTTGTGAG-3'                       | qPCR        |
| mTnf_F                       | 5'-ACGCTCTTCTGTCTACTGAACT-3'                     | qPCR        |
| mTnf_R                       | 5'-ATCTGAGTGTGAGGGTCTGG-3'                       | qPCR        |
| mNlrp3_F                     | 5'-GATTACCCGCCGAGAAAGG-3'                        | qPCR        |
| mNlrp3_R                     | 5'-CTTCTCCTCGCCATTGAAGT-3'                       | qPCR        |
| mPycard_F                    | 5'-TTAATCCAGCAACCAGGAG-3'                        | qPCR        |
| mPycard_R                    | 5'-CTTGAGTTAGGCCAGCCTTG-3'                       | qPCR        |
| mCasp1_F                     | 5'-CACAGCTCTGGAGATGGTGA-3'                       | qPCR        |
| mCasp1_R                     | 5'-CTTTCAAGCTTGGCACTTC-3'                        | qPCR        |
| mCsnk1a1_F                   | 5'-AAGGCCGAATTTATCGTCGGT-3'                      | qPCR        |
| mCsnk1a1_R                   | 5'-ACTTCTCGCCATTGGTGATG-3'                       | qPCR        |

Supplementary Table 3. Primers.

| Antibody                    | Supplier                       | Cat Number       | Clone   | Lot         | Dilution                    |
|-----------------------------|--------------------------------|------------------|---------|-------------|-----------------------------|
| anti-Actin                  | Sigma-Aldrich                  | MAB1501          | C4      | 3590048     | 1/10000 (WB)                |
| anti-ASC                    | Adipogen                       | AG-25B-0006-C100 | AL177   | A40922001   | 1/1000 (WB, IF), 1/300 (IP) |
| anti-ASC (N-15)             | Santa Cruz Biotechnology       | sc-22514-R       |         | I0712       | 1/1000 (WB, IF),            |
| anti-BRCC3                  | Cell Signaling Technology      | 18215S           | D5E5H   | 1           | 1/1000 (WB), 1/300 (IP)     |
| anti-Caspase-1              | BioLegend                      | 645102           | 5B10    | B257128     | 1/333 (WB)                  |
| anti-CK1 alpha              | Bethyl Laboratories            | A301-991A        |         | 1           | 1/500 (WB), 1/300 (IP)      |
| anti-CK1 alpha              | Santa Cruz Biotechnology       | sc-74582         | H-7     | J0620       | 1/100 (WB)                  |
| anti-Flag                   | Sigma-Aldrich                  | F3165            | M2      | SLCG2330    | 1/500 (WB)                  |
| anti-HA                     | Sigma-Aldrich                  | H3663            | HA-7    | 092M4827V   | 1/1000 (WB)                 |
| anti-IL-1b                  | R&D Systems                    | MAB4011          | 166926  |             | 1/500 (WB)                  |
| anti-IL-1b                  | Cell Signaling Technology      | 12703            | D3U3E   | 2           | 1/1000 (WB)                 |
| anti-LaminB1 (B-10)         | Santa Cruz Biotechnology       | sc-374015        |         | F1014       | 1/200 (WB)                  |
| anti-Myc                    | Sigma-Aldrich                  | C3956            |         |             | 1/500 (WB), 1/300 (IP)      |
| anti-NEK7                   | Abcam                          | ab133514         | EPR4900 | GR3258619-1 | 1/1000 (WB), 1/300 (IP)     |
| anti-NLRP3                  | Adipogen                       | AG-20B-0014-C100 | Cryo2   | A41812012   | 1/500 (WB), 1/400 (IP)      |
| anti-pNLRP3 <sub>S198</sub> | From Dr. Tao Li, Beijing China | N/A              |         |             | 1/1000 (WB)                 |
| anti-Ubiquitin              | Dako                           | Z0458            |         | 94251       | 1/200 (WB)                  |
| anti-Ubiquitin              | Santa Cruz Biotechnology       | sc-8017          |         | H2719       | 1/1000 (WB)                 |
| anti-Ubiquitin              | Cell Signaling Technology      | 3933             |         | 6           | 1/1000 (WB)                 |
| anti-Ubiquitin (K48)        | Cell Signaling Technology      | 4289             |         | 2           | 1/1000 (WB)                 |
| anti-Ubiquitin (K63)        | Cell Signaling Technology      | 5621             |         | 5           | 1/1000 (WB)                 |
| anti-VSV                    | Sigma-Aldrich                  | V5507            | P5D4    | 035M4777U   | 1/5000 (WB), 1/300 (IP)     |
| anti-phospho(Ser/Thr)       | Cell Signaling Technology      | 9631S            |         | 10          | 1/1000 (WB)                 |
| anti-Mouse IgG (H+ L)-HRP   | Promega                        | W402B            |         | 00441155    | 1/10000 (WB)                |
| anti-Rabbit IgG (H+L)-HRP   | Promega                        | W401B            |         | 390794      | 1/10000 (WB)                |
| anti-Rat IgM+IgG (H+L)-HRP  | Southern Biotech               | 3010-05          |         | G2512-M748B | 1/3000 (WB)                 |
| anti-Rabbit IgG (H+L)-HRP   | Invitrogen                     | A21074           |         |             | 1/3000 (WB)                 |
| IgG                         | Diagenode                      | C15410206        |         | RIG001AM    | 1/300 (IP)                  |
| anti-Flag agarose           | Sigma-Aldrich                  | A22220           | M2      |             | 1/30 (IP)                   |
| anti-HA agarose             | Sigma-Aldrich                  | A2095            | HA-7    | 048M4893V   | 1/30 (IP)                   |

Supplementary Table 4. Antibodies.

|                                    | Treatment                                                        | Conditons                                                           | Adjusted P Values                                                   | Significance |      |
|------------------------------------|------------------------------------------------------------------|---------------------------------------------------------------------|---------------------------------------------------------------------|--------------|------|
| Fig. 2d                            | Ordinary two-way ANOVA with Tukey's multiple comparisons         |                                                                     |                                                                     |              |      |
|                                    | LPS                                                              | plnd-NLRP3 WT vs. plnd                                              | 0.9907                                                              | ns           |      |
|                                    |                                                                  | plnd-NLRP3 WT vs. plnd-NLRP3 S806D                                  | 0.9915                                                              | ns           |      |
|                                    | LPS+Nig                                                          | plnd-NLRP3 WT vs. plnd                                              | <0.0001                                                             | ****         |      |
| plnd-NLRP3 WT vs. plnd-NLRP3 S806D |                                                                  | <0.0001                                                             | ****                                                                |              |      |
| Fig. 4b                            | Repeated measure two-way ANOVA with Sidak's multiple comparisons |                                                                     |                                                                     |              |      |
|                                    | 0 min                                                            | <i>Nlrp3</i> <sup>+/+</sup> vs. <i>Nlrp3</i> <sup>S803D/+</sup>     | 0.0971                                                              | ns           |      |
|                                    |                                                                  | <i>Nlrp3</i> <sup>+/+</sup> vs. <i>Nlrp3</i> <sup>S803D/S803D</sup> | 0.1296                                                              | ns           |      |
|                                    |                                                                  | <i>Nlrp3</i> <sup>+/+</sup> vs. <i>Nlrp3</i> <sup>-/-</sup>         | 0.0665                                                              | ns           |      |
|                                    | 10 min                                                           | <i>Nlrp3</i> <sup>+/+</sup> vs. <i>Nlrp3</i> <sup>S803D/+</sup>     | 0.0708                                                              | ns           |      |
|                                    |                                                                  | <i>Nlrp3</i> <sup>+/+</sup> vs. <i>Nlrp3</i> <sup>S803D/S803D</sup> | 0.0534                                                              | ns           |      |
|                                    |                                                                  | <i>Nlrp3</i> <sup>+/+</sup> vs. <i>Nlrp3</i> <sup>-/-</sup>         | 0.0461                                                              | *            |      |
|                                    | 20 min                                                           | <i>Nlrp3</i> <sup>+/+</sup> vs. <i>Nlrp3</i> <sup>S803D/+</sup>     | 0.0337                                                              | *            |      |
|                                    |                                                                  | <i>Nlrp3</i> <sup>+/+</sup> vs. <i>Nlrp3</i> <sup>S803D/S803D</sup> | 0.0201                                                              | *            |      |
|                                    |                                                                  | <i>Nlrp3</i> <sup>+/+</sup> vs. <i>Nlrp3</i> <sup>-/-</sup>         | 0.0198                                                              | *            |      |
|                                    | 30 min                                                           | <i>Nlrp3</i> <sup>+/+</sup> vs. <i>Nlrp3</i> <sup>S803D/+</sup>     | 0.0012                                                              | **           |      |
|                                    |                                                                  | <i>Nlrp3</i> <sup>+/+</sup> vs. <i>Nlrp3</i> <sup>S803D/S803D</sup> | 0.0015                                                              | **           |      |
|                                    |                                                                  | <i>Nlrp3</i> <sup>+/+</sup> vs. <i>Nlrp3</i> <sup>-/-</sup>         | 0.0015                                                              | **           |      |
|                                    | 40 min                                                           | <i>Nlrp3</i> <sup>+/+</sup> vs. <i>Nlrp3</i> <sup>S803D/+</sup>     | 0.0005                                                              | ***          |      |
|                                    |                                                                  | <i>Nlrp3</i> <sup>+/+</sup> vs. <i>Nlrp3</i> <sup>S803D/S803D</sup> | 0.0005                                                              | ***          |      |
|                                    |                                                                  | <i>Nlrp3</i> <sup>+/+</sup> vs. <i>Nlrp3</i> <sup>-/-</sup>         | 0.0005                                                              | ***          |      |
|                                    | 50 min                                                           | <i>Nlrp3</i> <sup>+/+</sup> vs. <i>Nlrp3</i> <sup>S803D/+</sup>     | 0.0004                                                              | ***          |      |
|                                    |                                                                  | <i>Nlrp3</i> <sup>+/+</sup> vs. <i>Nlrp3</i> <sup>S803D/S803D</sup> | 0.0002                                                              | ***          |      |
|                                    |                                                                  | <i>Nlrp3</i> <sup>+/+</sup> vs. <i>Nlrp3</i> <sup>-/-</sup>         | 0.0002                                                              | ***          |      |
|                                    | 60 min                                                           | <i>Nlrp3</i> <sup>+/+</sup> vs. <i>Nlrp3</i> <sup>S803D/+</sup>     | 0.0007                                                              | ***          |      |
|                                    |                                                                  | <i>Nlrp3</i> <sup>+/+</sup> vs. <i>Nlrp3</i> <sup>S803D/S803D</sup> | 0.0001                                                              | ***          |      |
|                                    |                                                                  | <i>Nlrp3</i> <sup>+/+</sup> vs. <i>Nlrp3</i> <sup>-/-</sup>         | 0.0001                                                              | ***          |      |
|                                    | 70 min                                                           | <i>Nlrp3</i> <sup>+/+</sup> vs. <i>Nlrp3</i> <sup>S803D/+</sup>     | 0.0010                                                              | ***          |      |
|                                    |                                                                  | <i>Nlrp3</i> <sup>+/+</sup> vs. <i>Nlrp3</i> <sup>S803D/S803D</sup> | <0.0001                                                             | ****         |      |
|                                    |                                                                  | <i>Nlrp3</i> <sup>+/+</sup> vs. <i>Nlrp3</i> <sup>-/-</sup>         | <0.0001                                                             | ****         |      |
|                                    | 80 min                                                           | <i>Nlrp3</i> <sup>+/+</sup> vs. <i>Nlrp3</i> <sup>S803D/+</sup>     | 0.0010                                                              | **           |      |
|                                    |                                                                  | <i>Nlrp3</i> <sup>+/+</sup> vs. <i>Nlrp3</i> <sup>S803D/S803D</sup> | <0.0001                                                             | ****         |      |
|                                    |                                                                  | <i>Nlrp3</i> <sup>+/+</sup> vs. <i>Nlrp3</i> <sup>-/-</sup>         | <0.0001                                                             | ****         |      |
|                                    | 90 min                                                           | <i>Nlrp3</i> <sup>+/+</sup> vs. <i>Nlrp3</i> <sup>S803D/+</sup>     | 0.0007                                                              | ***          |      |
|                                    |                                                                  | <i>Nlrp3</i> <sup>+/+</sup> vs. <i>Nlrp3</i> <sup>S803D/S803D</sup> | <0.0001                                                             | ****         |      |
|                                    |                                                                  | <i>Nlrp3</i> <sup>+/+</sup> vs. <i>Nlrp3</i> <sup>-/-</sup>         | <0.0001                                                             | ****         |      |
|                                    | 100 min                                                          | <i>Nlrp3</i> <sup>+/+</sup> vs. <i>Nlrp3</i> <sup>S803D/+</sup>     | 0.0028                                                              | **           |      |
|                                    |                                                                  | <i>Nlrp3</i> <sup>+/+</sup> vs. <i>Nlrp3</i> <sup>S803D/S803D</sup> | 0.0001                                                              | ***          |      |
|                                    |                                                                  | <i>Nlrp3</i> <sup>+/+</sup> vs. <i>Nlrp3</i> <sup>-/-</sup>         | <0.0001                                                             | ****         |      |
|                                    | 110 min                                                          | <i>Nlrp3</i> <sup>+/+</sup> vs. <i>Nlrp3</i> <sup>S803D/+</sup>     | 0.0043                                                              | **           |      |
|                                    |                                                                  | <i>Nlrp3</i> <sup>+/+</sup> vs. <i>Nlrp3</i> <sup>S803D/S803D</sup> | <0.0001                                                             | ****         |      |
|                                    |                                                                  | <i>Nlrp3</i> <sup>+/+</sup> vs. <i>Nlrp3</i> <sup>-/-</sup>         | <0.0001                                                             | ****         |      |
|                                    | Fig. 4d                                                          | Ordinary two-way ANOVA with Tukey's multiple comparisons            |                                                                     |              |      |
|                                    |                                                                  | LPS+Nig                                                             | <i>Nlrp3</i> <sup>+/+</sup> vs. <i>Nlrp3</i> <sup>-/-</sup>         | <0.0001      | **** |
|                                    |                                                                  |                                                                     | <i>Nlrp3</i> <sup>+/+</sup> vs. <i>Nlrp3</i> <sup>S803D/S803D</sup> | <0.0001      | **** |
|                                    | Fig. 4f                                                          | Ordinary two-way ANOVA with Tukey's multiple comparisons            |                                                                     |              |      |
|                                    |                                                                  | -                                                                   | <i>Nlrp3</i> <sup>+/+</sup> vs. <i>Nlrp3</i> <sup>-/-</sup>         | >0.9999      | ns   |
|                                    |                                                                  |                                                                     | <i>Nlrp3</i> <sup>+/+</sup> vs. <i>Nlrp3</i> <sup>S803D/S803D</sup> | >0.9999      | ns   |
|                                    |                                                                  | LPS                                                                 | <i>Nlrp3</i> <sup>+/+</sup> vs. <i>Nlrp3</i> <sup>-/-</sup>         | >0.9999      | ns   |
|                                    |                                                                  |                                                                     | <i>Nlrp3</i> <sup>+/+</sup> vs. <i>Nlrp3</i> <sup>S803D/S803D</sup> | >0.9999      | ns   |
|                                    |                                                                  | LPS+Nig                                                             | <i>Nlrp3</i> <sup>+/+</sup> vs. <i>Nlrp3</i> <sup>-/-</sup>         | <0.0001      | **** |
|                                    |                                                                  |                                                                     | <i>Nlrp3</i> <sup>+/+</sup> vs. <i>Nlrp3</i> <sup>S803D/S803D</sup> | <0.0001      | **** |
|                                    |                                                                  | Fig. 6a                                                             | Repeated measure two-way ANOVA with Sidak's multiple comparisons    |              |      |

|                       |                                                                                            |                                                                     |         |      |
|-----------------------|--------------------------------------------------------------------------------------------|---------------------------------------------------------------------|---------|------|
| IL-1b                 | 0 h                                                                                        | <i>Nlrp3</i> <sup>+/+</sup> vs. <i>Nlrp3</i> <sup>S803D/S803D</sup> | >0.9999 | ns   |
|                       | 2 h                                                                                        | <i>Nlrp3</i> <sup>+/+</sup> vs. <i>Nlrp3</i> <sup>S803D/S803D</sup> | 0.0318  | *    |
|                       | 4h                                                                                         | <i>Nlrp3</i> <sup>+/+</sup> vs. <i>Nlrp3</i> <sup>S803D/S803D</sup> | <0.0001 | **** |
| IL-18                 | 0 h                                                                                        | <i>Nlrp3</i> <sup>+/+</sup> vs. <i>Nlrp3</i> <sup>S803D/S803D</sup> | 0.7305  | ns   |
|                       | 2 h                                                                                        | <i>Nlrp3</i> <sup>+/+</sup> vs. <i>Nlrp3</i> <sup>S803D/S803D</sup> | 0.0428  | *    |
|                       | 4h                                                                                         | <i>Nlrp3</i> <sup>+/+</sup> vs. <i>Nlrp3</i> <sup>S803D/S803D</sup> | <0.0001 | **** |
| IL-1a                 | 0 h                                                                                        | <i>Nlrp3</i> <sup>+/+</sup> vs. <i>Nlrp3</i> <sup>S803D/S803D</sup> | 0.9675  | ns   |
|                       | 2 h                                                                                        | <i>Nlrp3</i> <sup>+/+</sup> vs. <i>Nlrp3</i> <sup>S803D/S803D</sup> | 0.0506  | ns   |
|                       | 4h                                                                                         | <i>Nlrp3</i> <sup>+/+</sup> vs. <i>Nlrp3</i> <sup>S803D/S803D</sup> | 0.0170  | *    |
| TNF                   | 0 h                                                                                        | <i>Nlrp3</i> <sup>+/+</sup> vs. <i>Nlrp3</i> <sup>S803D/S803D</sup> | >0.9999 | ns   |
|                       | 2 h                                                                                        | <i>Nlrp3</i> <sup>+/+</sup> vs. <i>Nlrp3</i> <sup>S803D/S803D</sup> | 0.2815  | ns   |
|                       | 4h                                                                                         | <i>Nlrp3</i> <sup>+/+</sup> vs. <i>Nlrp3</i> <sup>S803D/S803D</sup> | >0.9999 | ns   |
| IL-6                  | 0 h                                                                                        | <i>Nlrp3</i> <sup>+/+</sup> vs. <i>Nlrp3</i> <sup>S803D/S803D</sup> | >0.9999 | ns   |
|                       | 2 h                                                                                        | <i>Nlrp3</i> <sup>+/+</sup> vs. <i>Nlrp3</i> <sup>S803D/S803D</sup> | 0.9687  | ns   |
|                       | 4h                                                                                         | <i>Nlrp3</i> <sup>+/+</sup> vs. <i>Nlrp3</i> <sup>S803D/S803D</sup> | 0.8174  | ns   |
| Fig. 6b               | Two-sided Mantel-Cox test                                                                  |                                                                     |         |      |
|                       | LPS                                                                                        | <i>Nlrp3</i> <sup>+/+</sup> vs. <i>Nlrp3</i> <sup>S803D/S803D</sup> | 0.0030  | **   |
| Fig. 7a               | Ordinary one-way ANOVA with Dunnett's multiple comparison test with single pooled variance |                                                                     |         |      |
|                       | LPS+Nig                                                                                    | NT vs. <i>Csnk1g3</i>                                               | 0.4756  | ns   |
|                       |                                                                                            | NT vs. <i>Csnk2a2</i>                                               | 0.7862  | ns   |
|                       |                                                                                            | NT vs. <i>Csnk1g2</i>                                               | 0.9878  | ns   |
|                       |                                                                                            | NT vs. <i>Cask</i>                                                  | 0.9947  | ns   |
|                       |                                                                                            | NT vs. <i>Eef2k</i>                                                 | 0.9959  | ns   |
|                       |                                                                                            | NT vs. <i>Camk1d</i>                                                | 0.9996  | ns   |
|                       |                                                                                            | NT vs. <i>Csnk1d</i>                                                | 0.9727  | ns   |
|                       |                                                                                            | NT vs. <i>Camk2g</i>                                                | 0.9161  | ns   |
|                       |                                                                                            | NT vs. <i>Csnk1e</i>                                                | 0.7138  | ns   |
|                       |                                                                                            | NT vs. <i>Camk1g</i>                                                | 0.1375  | ns   |
|                       |                                                                                            | NT vs. <i>Camk1</i>                                                 | 0.1280  | ns   |
|                       |                                                                                            | NT vs. <i>Camk2d</i>                                                | 0.1001  | ns   |
|                       |                                                                                            | NT vs. <i>Csnk1g1</i>                                               | 0.0103  | *    |
|                       |                                                                                            | NT vs. <i>Camk2a</i>                                                | 0.0048  | **   |
|                       |                                                                                            | NT vs. <i>Csnk2a1</i>                                               | 0.0034  | **   |
|                       |                                                                                            | NT vs. <i>Camkk2</i>                                                | 0.0016  | **   |
|                       |                                                                                            | NT vs. <i>Camk2b</i>                                                | 0.0001  | **** |
|                       |                                                                                            | NT vs. <i>Camk4</i>                                                 | 0.0001  | **** |
| NT vs. <i>Csnk2b</i>  | 0.0001                                                                                     | ****                                                                |         |      |
| NT vs. <i>Csnk1a1</i> | 0.0001                                                                                     | ****                                                                |         |      |
| NT vs. <i>Nlrp3</i>   | 0.0001                                                                                     | ****                                                                |         |      |
| Fig. 7c               | Ordinary two-way ANOVA with Tukey's multiple comparisons                                   |                                                                     |         |      |
| IL-18                 | -                                                                                          | NT vs. <i>Csnk1a1</i>                                               | 0.9902  | ns   |
|                       |                                                                                            | NT vs. <i>Nlrp3</i>                                                 | 0.9660  | ns   |
|                       | LPS                                                                                        | NT vs. <i>Csnk1a1</i>                                               | 0.9703  | ns   |
|                       |                                                                                            | NT vs. <i>Nlrp3</i>                                                 | 0.7459  | ns   |
|                       | LPS+Nig                                                                                    | NT vs. <i>Csnk1a1</i>                                               | <0.0001 | **** |
|                       |                                                                                            | NT vs. <i>Nlrp3</i>                                                 | <0.0001 | **** |
| TNF                   | -                                                                                          | NT vs. <i>Csnk1a1</i>                                               | 0.9827  | ns   |
|                       |                                                                                            | NT vs. <i>Nlrp3</i>                                                 | 0.9836  | ns   |
|                       | LPS                                                                                        | NT vs. <i>Csnk1a1</i>                                               | 0.0841  | ns   |
|                       |                                                                                            | NT vs. <i>Nlrp3</i>                                                 | 0.8889  | ns   |
| Fig. 7d               | Ordinary two-way ANOVA with Tukey's multiple comparisons                                   |                                                                     |         |      |
|                       | LPS                                                                                        | NT vs. <i>Csnk1a1</i>                                               | >0.9999 | ns   |
|                       | LPS+Nig                                                                                    | NT vs. <i>Csnk1a1</i>                                               | <0.0001 | **** |
| Sup Fig. 4c           | Ordinary two-way ANOVA with Tukey's multiple comparisons                                   |                                                                     |         |      |
| IL-1b                 | -                                                                                          | <i>Nlrp3</i> <sup>+/+</sup> vs. <i>Nlrp3</i> <sup>+/-</sup>         | 0.9997  | ns   |
|                       |                                                                                            | <i>Nlrp3</i> <sup>+/+</sup> vs. <i>Nlrp3</i> <sup>-/-</sup>         | 0.9992  | ns   |
|                       |                                                                                            | <i>Nlrp3</i> <sup>+/+</sup> vs. <i>Nlrp3</i> <sup>S803D/+</sup>     | 0.9855  | ns   |
|                       |                                                                                            | <i>Nlrp3</i> <sup>+/+</sup> vs. <i>Nlrp3</i> <sup>S803D/S803D</sup> | 0.9811  | ns   |

|                                                                     |                                                          |                                                                     |         |      |
|---------------------------------------------------------------------|----------------------------------------------------------|---------------------------------------------------------------------|---------|------|
|                                                                     | LPS                                                      | <i>Nlrp3</i> <sup>+/+</sup> vs. <i>Nlrp3</i> <sup>+/-</sup>         | 0.9954  | ns   |
|                                                                     |                                                          | <i>Nlrp3</i> <sup>+/+</sup> vs. <i>Nlrp3</i> <sup>-/-</sup>         | 0.9999  | ns   |
|                                                                     |                                                          | <i>Nlrp3</i> <sup>+/+</sup> vs. <i>Nlrp3</i> <sup>S803D/+</sup>     | 0.9989  | ns   |
|                                                                     |                                                          | <i>Nlrp3</i> <sup>+/+</sup> vs. <i>Nlrp3</i> <sup>S803D/S803D</sup> | 0.9862  | ns   |
|                                                                     | LPS+Nig                                                  | <i>Nlrp3</i> <sup>+/+</sup> vs. <i>Nlrp3</i> <sup>+/-</sup>         | <0.0001 | **** |
|                                                                     |                                                          | <i>Nlrp3</i> <sup>+/+</sup> vs. <i>Nlrp3</i> <sup>-/-</sup>         | <0.0001 | **** |
|                                                                     |                                                          | <i>Nlrp3</i> <sup>+/+</sup> vs. <i>Nlrp3</i> <sup>S803D/+</sup>     | <0.0001 | **** |
|                                                                     |                                                          | <i>Nlrp3</i> <sup>+/+</sup> vs. <i>Nlrp3</i> <sup>S803D/S803D</sup> | <0.0001 | **** |
| IL-18                                                               | -                                                        | <i>Nlrp3</i> <sup>+/+</sup> vs. <i>Nlrp3</i> <sup>+/-</sup>         | 0.9973  | ns   |
|                                                                     |                                                          | <i>Nlrp3</i> <sup>+/+</sup> vs. <i>Nlrp3</i> <sup>-/-</sup>         | 0.8711  | ns   |
|                                                                     |                                                          | <i>Nlrp3</i> <sup>+/+</sup> vs. <i>Nlrp3</i> <sup>S803D/+</sup>     | 0.0958  | ns   |
|                                                                     |                                                          | <i>Nlrp3</i> <sup>+/+</sup> vs. <i>Nlrp3</i> <sup>S803D/S803D</sup> | 0.9509  | ns   |
|                                                                     | LPS                                                      | <i>Nlrp3</i> <sup>+/+</sup> vs. <i>Nlrp3</i> <sup>+/-</sup>         | 0.9962  | ns   |
|                                                                     |                                                          | <i>Nlrp3</i> <sup>+/+</sup> vs. <i>Nlrp3</i> <sup>-/-</sup>         | 0.9976  | ns   |
|                                                                     |                                                          | <i>Nlrp3</i> <sup>+/+</sup> vs. <i>Nlrp3</i> <sup>S803D/+</sup>     | 0.6729  | ns   |
|                                                                     |                                                          | <i>Nlrp3</i> <sup>+/+</sup> vs. <i>Nlrp3</i> <sup>S803D/S803D</sup> | 0.9999  | ns   |
|                                                                     | LPS+Nig                                                  | <i>Nlrp3</i> <sup>+/+</sup> vs. <i>Nlrp3</i> <sup>+/-</sup>         | <0.0001 | **** |
|                                                                     |                                                          | <i>Nlrp3</i> <sup>+/+</sup> vs. <i>Nlrp3</i> <sup>-/-</sup>         | <0.0001 | **** |
|                                                                     |                                                          | <i>Nlrp3</i> <sup>+/+</sup> vs. <i>Nlrp3</i> <sup>S803D/+</sup>     | <0.0001 | **** |
|                                                                     |                                                          | <i>Nlrp3</i> <sup>+/+</sup> vs. <i>Nlrp3</i> <sup>S803D/S803D</sup> | <0.0001 | **** |
| Sup Fig. 4f                                                         | Ordinary two-way ANOVA with Tukey's multiple comparisons |                                                                     |         |      |
| IL-1b                                                               | -                                                        | <i>Nlrp3</i> <sup>+/+</sup> vs. <i>Nlrp3</i> <sup>-/-</sup>         | 0.9996  | ns   |
|                                                                     |                                                          | <i>Nlrp3</i> <sup>+/+</sup> vs. <i>Nlrp3</i> <sup>S803D/+</sup>     | >0.9999 | ns   |
|                                                                     |                                                          | <i>Nlrp3</i> <sup>+/+</sup> vs. <i>Nlrp3</i> <sup>S803D/S803D</sup> | 0.9989  | ns   |
|                                                                     | Pam3                                                     | <i>Nlrp3</i> <sup>+/+</sup> vs. <i>Nlrp3</i> <sup>-/-</sup>         | 0.8053  | ns   |
|                                                                     |                                                          | <i>Nlrp3</i> <sup>+/+</sup> vs. <i>Nlrp3</i> <sup>S803D/+</sup>     | 0.9064  | ns   |
|                                                                     |                                                          | <i>Nlrp3</i> <sup>+/+</sup> vs. <i>Nlrp3</i> <sup>S803D/S803D</sup> | 0.7277  | ns   |
|                                                                     | Pam3+tLPS                                                | <i>Nlrp3</i> <sup>+/+</sup> vs. <i>Nlrp3</i> <sup>-/-</sup>         | <0.0001 | **** |
|                                                                     |                                                          | <i>Nlrp3</i> <sup>+/+</sup> vs. <i>Nlrp3</i> <sup>S803D/+</sup>     | <0.0001 | **** |
| <i>Nlrp3</i> <sup>+/+</sup> vs. <i>Nlrp3</i> <sup>S803D/S803D</sup> |                                                          | <0.0001                                                             | ****    |      |
| Sup Fig. 8                                                          | Two-sided Mantel-Cox test                                |                                                                     |         |      |
|                                                                     | LPS                                                      | <i>Nlrp3</i> <sup>+/+</sup> vs. <i>Nlrp3</i> <sup>S803D/S803D</sup> | 0.0342  | *    |

Supplementary Table 5. Statistical tests and P values.
